# Supplementary material
Source: PubMed Central journal article supplement (PMC4308501)
Supplement: NIHMS641132-supplement-supplement_1.pdf [file NIHMS641132-supplement-supplement_1.pdf]

### Supplementary Tables

**Table S1:** Reported normal ranges of integrated relaxation pressure (IRP) for control subjects in a supine position among studies and among manometric devices. The 95<sup>th</sup> percentile is used as the upper limit of normal (UNL).

| Manufacturer | Citation            | Manometric Assembly Design                                                 | Number of controls | IRP (mmHg) Median (ULN)         |
|--------------|---------------------|----------------------------------------------------------------------------|--------------------|---------------------------------|
| Sierra       | Ghosh 2007 [6]      | 36 circumferential solid-state sensors (Sierra*)                           | 75                 | 3 (11) upright<br>8 (15) supine |
| Sierra       | Sweis 2011 [8]      | 36 circumferential solid-state sensors (Sierra*)                           | 23‡                | 6 (15) upright<br>3 (9) supine  |
| Given        | Niebisch 2013 [7]   | 36 circumferential solid-state sensors (Sierra*)                           | 68                 | 9 (17)                          |
| Given        | Weijenborg 2014 [9] | 36 circumferential solid-state sensors (Sierra*)                           | 50                 | 7 (16)                          |
| MMS          | Bogte 2013 [4]      | 36 solid state unidirectional sensors (Unisensor AG)                       | 52                 | 12 (28)                         |
| MMS          | Kessing 2014 [41]   | 36-channel water perfused catheter ¶ (Dentsleeve, Mississauga, ON, Canada) | 50                 | 7 (19)                          |
| Sandhill     | Shi 2013 [5]        | 32 solid state sensors and 5 dual impedance sensors (Unisensor AG)         | 42                 | 14 (21)                         |

\*Device design was by Sierra Scientific Instruments, which was subsequently acquired by Given Imaging in 2010, then Covidien in 2013, and most recently Medtronic in 2014

‡ upright, supine values as reported

¶ Electronically generated e-sleeve

**Table S2:** Reported normal ranges of distal contractile integral (DCI) and distal latency (DL) for control subjects in a supine position among studies and among manometric devices.

| Manufacturer | Citation            | Design                                                                   | Number of controls | Median DCI (5-95 <sup>th</sup> percentile) (mmHg·s·cm)       | Median DL (5 <sup>th</sup> percentile) (s)                 |
|--------------|---------------------|--------------------------------------------------------------------------|--------------------|--------------------------------------------------------------|------------------------------------------------------------|
| Sierra       | Xiao 2012 [38]      | 36 circumferential solid-state sensors (Sierra*)                         | 75                 | 1612 (448-4721)                                              | 5.8 (4.3)                                                  |
| Given        | Niebisch 2013 [7]   | 36 circumferential solid-state sensors (Sierra*)                         | 68                 | 2103 (628-7234)¶                                             | 6.8 (5.4)                                                  |
| Given        | Weijenborg 2014 [9] | 36 circumferential solid-state sensors (Sierra*)                         | 50                 | 834 (178-2828)                                               | 6.8 (5.4)                                                  |
| MMS          | Bogte 2013 [4]      | 36 solid state unidirectional sensors (Unisensor AG)                     | 52                 | 1008 (186-3407)                                              | 6.1 (5.0)                                                  |
| MMS          | Kessing 2014 [41]   | 36-channel water perfused catheter (Dentsleeve, Mississauga, ON, Canada) | 50                 | 970 (142-3675)                                               | 7.4 (6.2)                                                  |
| Sandhill     | Shi 2013 [5]        | 32 solid state sensors and 5 dual impedance sensors                      | 42                 | 1527 (25 <sup>th</sup> percentile = 1188; only IQR reported) | 5.2 (25 <sup>th</sup> percentile = 4.9; only IQR reported) |

\*Device design was by Sierra Scientific Instruments, which was subsequently acquired by Given Imaging in 2010, then Covidien in 2013, and most recently Medtronic in 2014

¶ the highest value per subject was reported

**Table S3:** Reported normal ranges of basal EGJ pressures for control subjects in a supine position among studies and among manometric devices.

| Manufacturer | Citation                                   | Design                                                                     | Number of control subjects | Expiratory EGJ pressure Median (5 <sup>th</sup> -95 <sup>th</sup> percentile) (mmHg) | End inspiratory EGJ pressure Median (IQR) (mmHg) |
|--------------|--------------------------------------------|----------------------------------------------------------------------------|----------------------------|--------------------------------------------------------------------------------------|--------------------------------------------------|
| Sierra       | Pandolfino 2006 [42]<br>Nicodème 2014 [20] | 36 circumferential solid-state sensors (Sierra*)                           | 75                         | 14 (5-32)                                                                            | 34                                               |
| Sierra       | Sweis 2011 [8]                             | 36 circumferential solid-state sensors (Sierra*)                           | 23                         | 19 (5-38)<br>(23 (8-34) for upright position)                                        | Not reported                                     |
| Given        | Niebisch 2013 [7]                          | 36 circumferential solid-state sensors (Sierra*)                           | 68                         | 15 (3-31)                                                                            | Not reported                                     |
| Given        | Weijnenborg 2014 [9]                       | 36 circumferential solid-state sensors (Sierra*)                           | 50                         | 15 (3-31)                                                                            | Not reported                                     |
| MMS          | Bogte 2013 [4]                             | 36 solid state unidirectional sensors (Unisensor AG)                       | 52                         | 31 (9-51)                                                                            | Not reported                                     |
| MMS          | Kessing 2014 [41]                          | 36 channel water perfused catheter ¶ (Dentsleeve, Mississauga, ON, Canada) | 50                         | 10 (3-30)                                                                            | Not reported                                     |
| Sandhill     |                                            |                                                                            |                            | No data available                                                                    | No data available                                |

\*Device design was by Sierra Scientific Instruments, which was subsequently acquired by Given Imaging in 2010, then Covidien in 2013, and most recently Medtronic in 2014

¶ Electronically generated e-sleeve
